# Supplementary figures and images for: Studies on the antioxidant properties and bioavailability of meso-zeaxanthin
Source: Research Square preprint supplement (doi:10.21203/rs.3.rs-6869584/v1), 2025-06-26

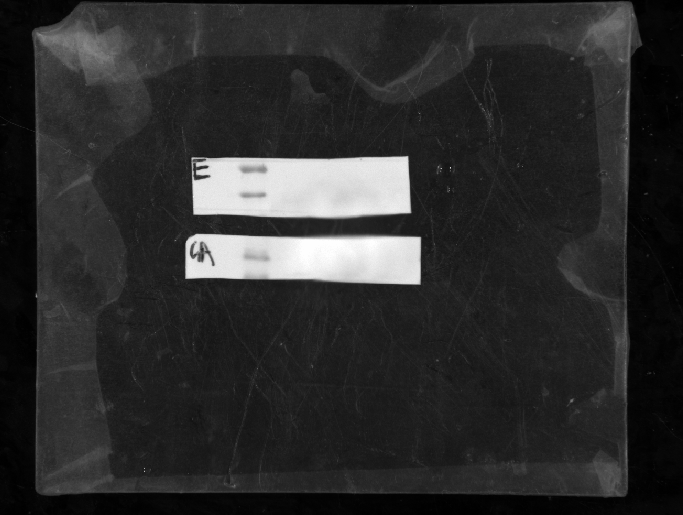

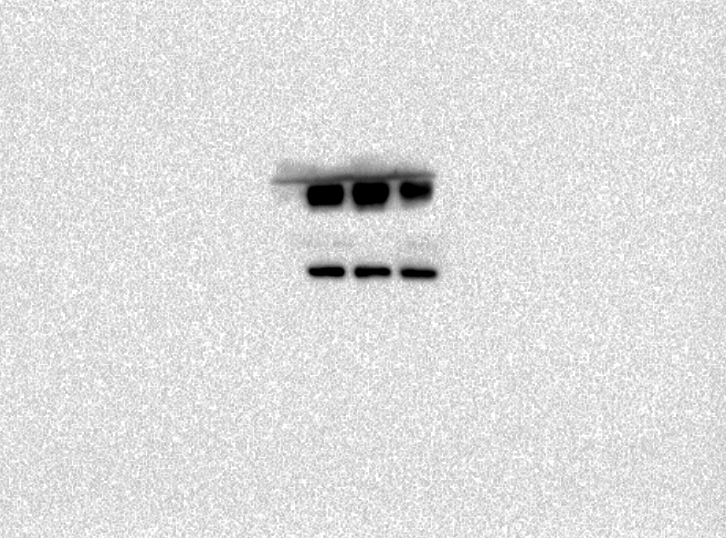


ERK


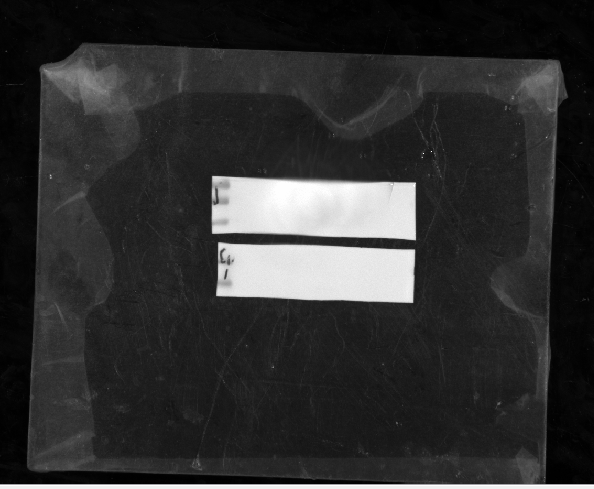

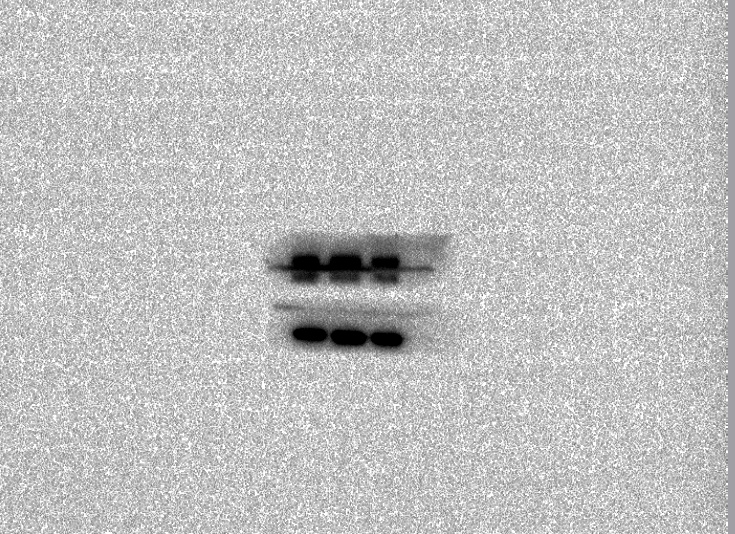


JNK


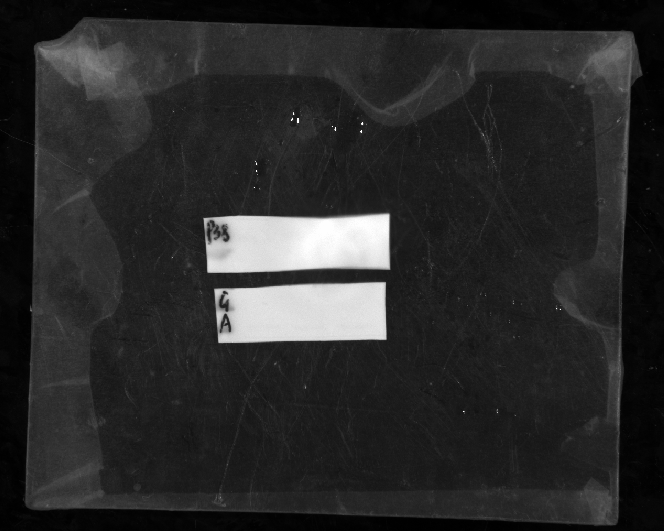

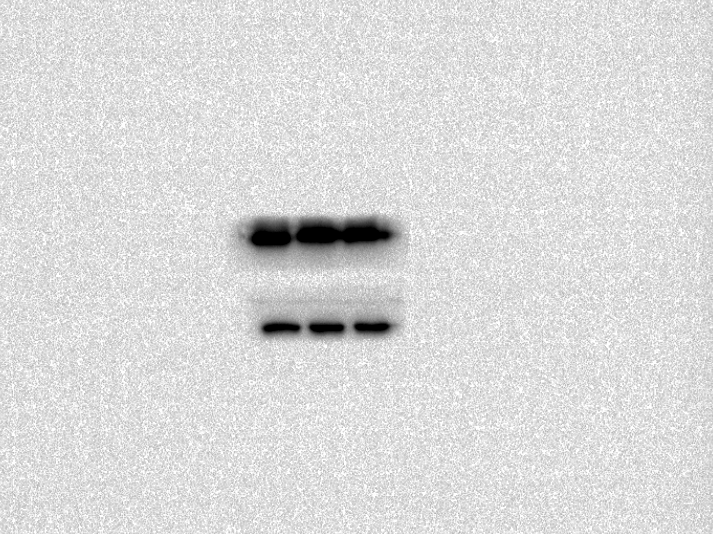


p38

Supplement: Supplementary file 1 [file af1b264ed9e32f128b6afc5e.docx]
